# Supplementary material for: Birth weight–stratified analysis of retinopathy of prematurity: a single-center cohort including infants below 400 g
Source: Research Square preprint supplement (doi:10.21203/rs.3.rs-8586630/v1), 2026-02-16
Supplement: Supplementary file 1 [file 6d7529ff1606d33b0f0b1c88.docx]

**Supplementary Table 1. Baseline characteristics of the infants who developed ROP**

| Variable | ROP (+) Untreated | ROP (+) Treated | P values,  untreated vs treated |
| --- | --- | --- | --- |
| N (% of total) | 91 (34.2) | 41 (15.4) |  |
| Male/female | 54/37 | 19/22 | 0.230 |
| BW (g),  Mean ± SD  Median (range) | 909.0±348.8  887 (279-1797) | 758.0±340.7  647 (308-1657) | 0.009* |
| GA (week),  Mean ± SD  Median (range) | 27.5±2.5  27.7 (22.9-32.6) | 26.1±3.0  25.9 (22.0-32.9) | 0.006* |

ROP; retinopathy of prematurity, ROP (+); infants who developed ROP, BW; birth weight, GA; gestational age, SD; standard deviation, *; P < 0.05. N in total (266) is of post-screening. Sex was compared using the χ² test. BW and GA were evaluated using the Mann–Whitney U test.
